# Supplementary material for: Genome-Wide Mapping Indicates That p73 and p63 Co-Occupy Target Sites and Have Similar DNA-Binding Profiles In Vivo
Source: PLOS journal article supplement (doi:10.1371/journal.pone.0011572), 2010-07-14

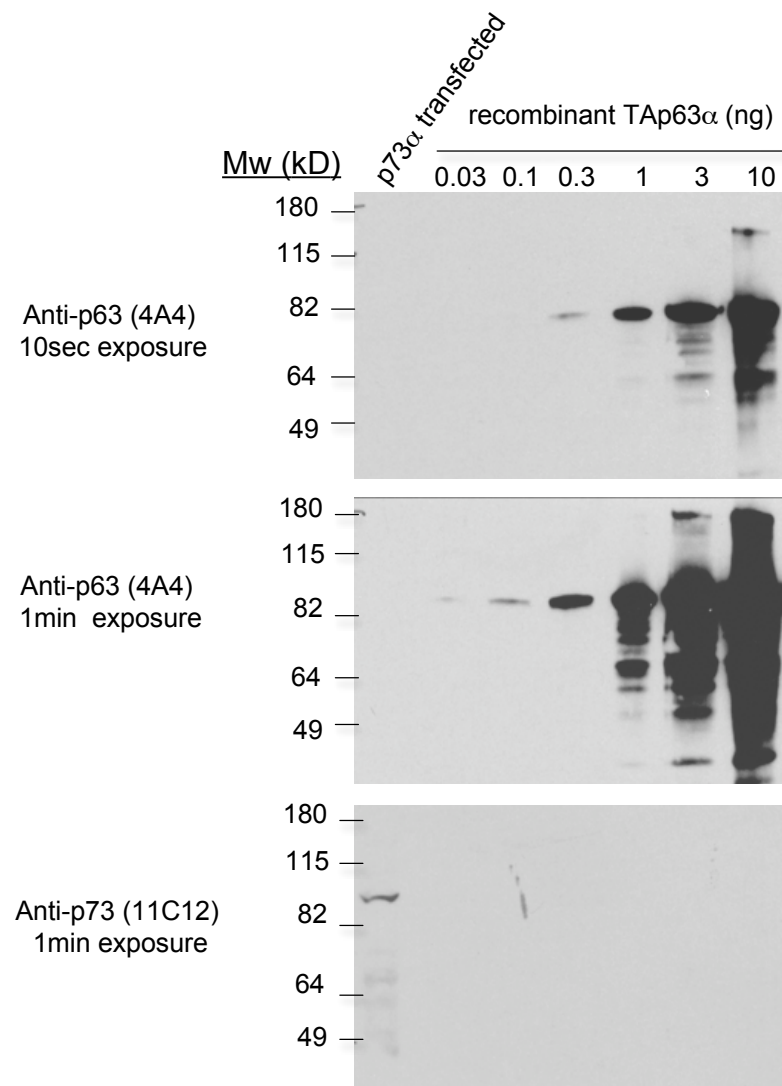

Supplement: S3 (10.1371/journal.pone.0011572.s003) [file journal.pone.0011572.s003]
